# Supplementary material
Source: PubMed Central journal article supplement (PMC4999573)
Supplement: 40744_2015_23_MOESM1_ESM.pdf [file 40744_2015_23_MOESM1_ESM.pdf]

## *Why carry out this study?*

- There is insufficient evidence regarding the appropriate dose of methotrexate (MTX) required to achieve specific treatment goals in rheumatoid arthritis (RA) patients receiving biologic drugs in Japan.
- We hypothesized that the dose-response effect of MTX in combination with adalimumab on the achievement of low disease activity (LDA) and/or remission would differ between biologic-naïve and biologic-exposed patients with RA.

## *What was learned from the study?*

- In biologic-naïve patients, LDA/remission rates increased with MTX doses of up to 6-8 mg/week and then plateaued at higher doses, whereas in biologic-treated patients, there was a dose-dependent increase up to  $\geq 10$  mg/week of MTX.
- Our results suggest that 8 mg/week of MTX would be sufficient for this patient population.

This summary slide represents the opinions of the authors. Sponsorship for this study was funded by AbbVie GK, Tokyo, Japan. For a full list of acknowledgments and disclosures for all authors of this article, please see the full text online. © The Author(s) 2015. Creative Commons Attribution Noncommercial License (CC BY-NC).
